# Evidence of an Unusual Poly(A) RNA Signature Detected by High-throughput Chemical Mapping

Roger Wellington-Oguri,\* Eli Fisker, Mathew Zada, Michelle Wiley, Eterna Players

Eterna Massive Open Laboratory.

*Supporting Information Placeholder*

---

**ABSTRACT:** Homopolymeric adenosine RNA plays numerous roles in both cells and non-cellular genetic material, and for lack of evidence to the contrary, it is generally accepted to form a random coil under physiological conditions. However, chemical mapping data generated by the Eterna Massive Open Laboratory indicates that a poly (A) sequence of length seven or more, at pH 8.0 and MgCl concentrations of 10 mM, develops unexpected protection to selective 2'-hydroxyl acylation read out by primer extension (SHAPE) and dimethyl sulfate (DMS) chemical probing. This protection first appears in poly(A) sequences of length 7 and grows to its maximum strength at length ~10. In a long poly(A) sequence, substitution of a single A by any other nucleotide disrupts the protection, but only for the 6 or so nucleotides on the 5' side of the substitution. The authors are grateful for pre-publication comments; please use <https://docs.google.com/document/d/14972Q36IDTYMglwMXTOrqd4P9orQ6-P3bPbCuITdv6A>.

---

Homopolymeric poly(A) plays many regulatory roles in eukaryotes, prokaryotes<sup>1</sup>, organelles<sup>2,3</sup>, retroviruses<sup>4</sup> and retrotransposons.<sup>5</sup> Perhaps the most well-studied roles are those involving the lengthening and shortening of poly(A) tails added to various types of RNA sequences. In the case of mRNA, poly(A) tails are involved in transcription, nuclear export, translation initiation, protein synthesis regulation and, ultimately, decay of the mRNA.

Given all these roles, together with the observation that there is no information in a poly(A) sequence other than its length, it is reasonable to suspect that there is something about its structure that makes it so ubiquitous in vivo. Indeed, starting in the 1950's, many experiments were done to determine the structure. Evidence was found of a single stranded structure forming under neutral pH,<sup>6,7,8</sup> and specific molecular level single stranded models for it were proposed.<sup>9,10</sup> More recently, new experimental techniques such as atomic force microscopy,<sup>11</sup> nanoscale pores<sup>12</sup> and vibrational circular dichroism<sup>13</sup> have provided additional supporting evi-

dence. Nonetheless, homopolymeric poly(A) still is generally assumed to form a random coil, or perhaps a stacked conformation like one strand of an A-form helix, at neutral pH.

Unlike previous experiments, chemical mapping provides measurements at the granularity of individual nucleotides. These measurements, in isolation, are not generally sufficient to determine RNA secondary or tertiary structure, but they can suggest molecular-level models testable by other experiments.

The data we report here come from the archives of Eterna.<sup>14</sup> Eterna is an Internet-based citizen science project centered around designing, testing and analyzing synthetic RNA molecules. It is presented as a game, so participants refer to themselves as "players." In Eterna's first lab experiments, players created inverse folding puzzles — given a secondary structure, design an RNA molecule that adopts that folding. These secondary structures were often more challenging than naturally occurring RNAs.<sup>15</sup> Players then voted on which puzzles would be tested experimentally, created submissions and voted for the best designs. A limited number of designs (typically ~100 per puzzle) were selected and given to the Stanford Das Lab, which performed chemical mapping experiments to determine the reactivity of each nucleotide of each design.<sup>16</sup>

Between 2013 and 2015, 27 rounds of high-throughput chemical mapping experiments tested more than 44,000 RNA sequences designed to solve over 500 unique puzzles. From these data, we have chosen puzzles that had single stranded sections of various sizes and loop type and also had a significant number of submissions with long poly(A) sequences. In order to eliminate any effect of variation in the experimental process over time, each of our examples is limited to data from a single experimental round.

Chemical mapping can be done with a variety of chemical probes, each measuring a somewhat different aspect of a nucleotide. SHAPE probes measure the reactivity of the 2' hydroxyl group of the backbone, which is highly indicative of how flexible the backbone is at that nucleotide position and hence of base pairing.<sup>17</sup> This

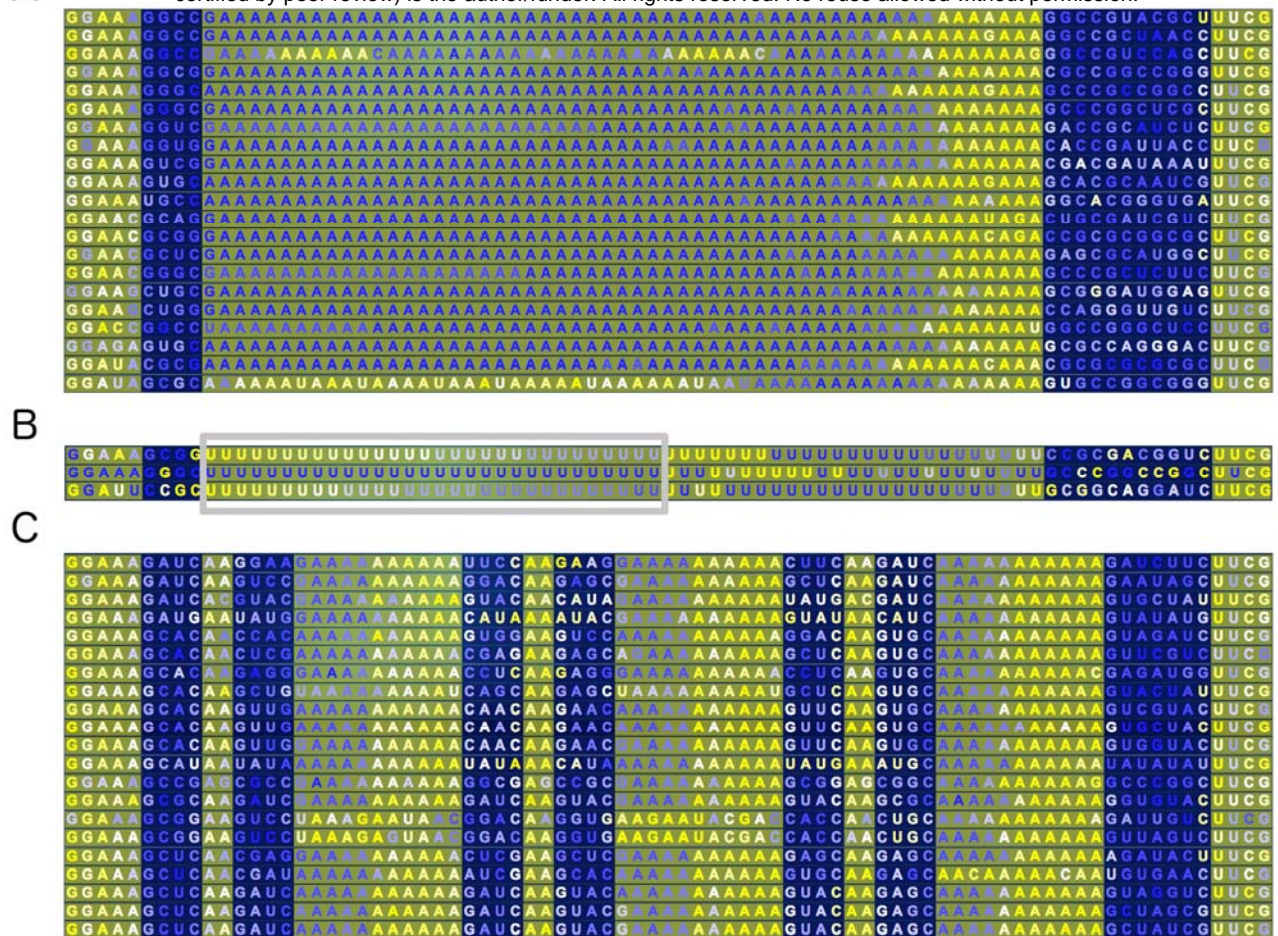

makes the measurements comparable across all nucleotide types. DMS, on the other hand, reacts with N1 of adenosine and N3 of cytosine, while CMCT reacts primarily with N3 of U and N1 of G and detects the ab-

sence of nucleotide pairing.<sup>18</sup> The SHAPE probe 1-methyl-7-nitroisatoic anhydride (1M7) was used in all of the Eterna experiments. In

Figure 1. Excerpt of 1M7 SHAPE results for two lab puzzles. Nucleotide letter coloring varies from dark blue (highly protected) to bright yellow (highly exposed). Nucleotide background color reflects whether the puzzle expects the nucleotide to be paired (dark blue) or unpaired (grey.) (A) Big Hairpin Loop, designs selected for having 10+ consecutive unpaired adenosines. For most designs, only the ~6 adenosines at the 3' end of the loop are fully exposed. Where a non-adenosine appears, the exposure is extended in the 5' direction. (B) Big Hairpin Loop, designs with 10+ consecutive uracils. Despite having only three instances of poly(U), the pattern is clearly not at all like poly(A). The smooth gradient of protection values marked with a grey rectangle is an artifact of the limited sequencer read length used in the experiment. (C) Triangle of Doom, designs with 10+ consecutive A's. The first two column ranges containing mostly A's are hairpin loops. The third range is an exterior loop.

one round, three different probes with relevance to poly(A), 1M7, N-methylisatoic anhydride (NMIA), another SHAPE probe, and DMS were all used. In what follows, we report on the 1M7 data, adding the NMIA and DMS data where it is available.

Figure 1 shows the 1M7 measurements for a selection of designs that contain poly(A) sequences. This is the data display that first drew our attention to the unexpected protection of the 3' end of a poly(A) sequence.

Figure 2 compares the median reactivity at each position of two subsets of the designs, for each of the puzzles in Figure 1. The first subset (left column) contains all those designs with only A's over a defined range of

positions. The second subset, for comparison, is all the designs that have no occurrence of more than six consecutive A's.

The experimental round for this data tested all the designs with three relevant chemical reagents 1M7, NMIA, and DMS. NMIA, like 1M7, is a SHAPE probe that forms a chemical bond with the 2' hydroxyl of the backbone

A

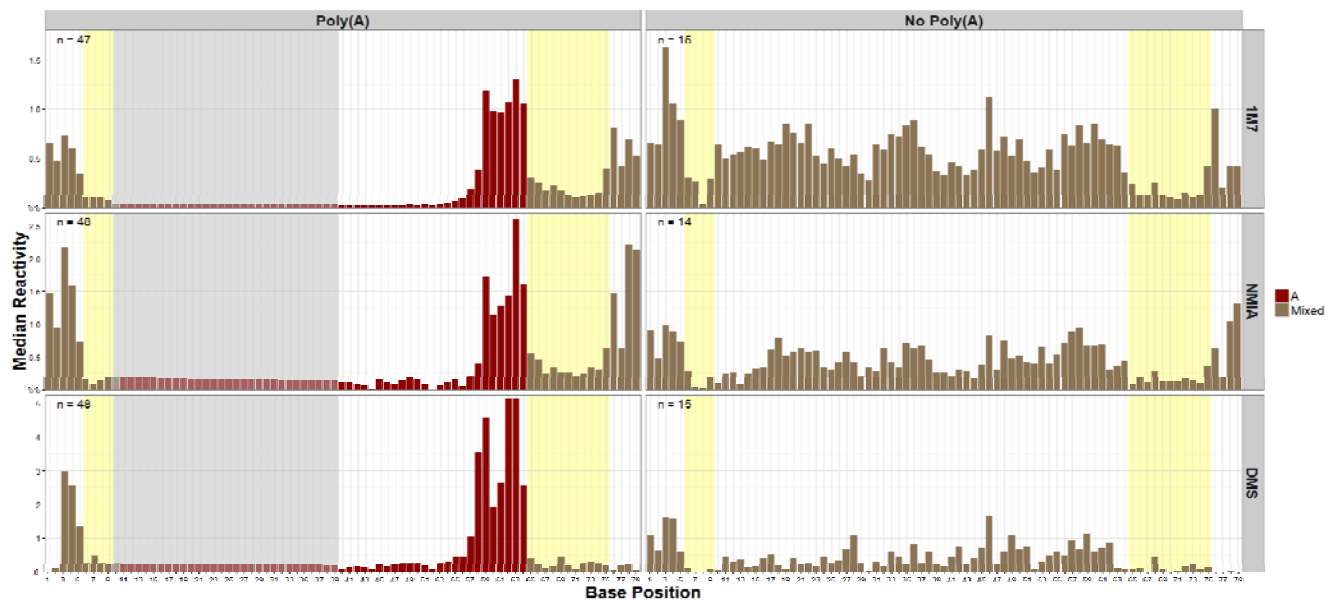

B

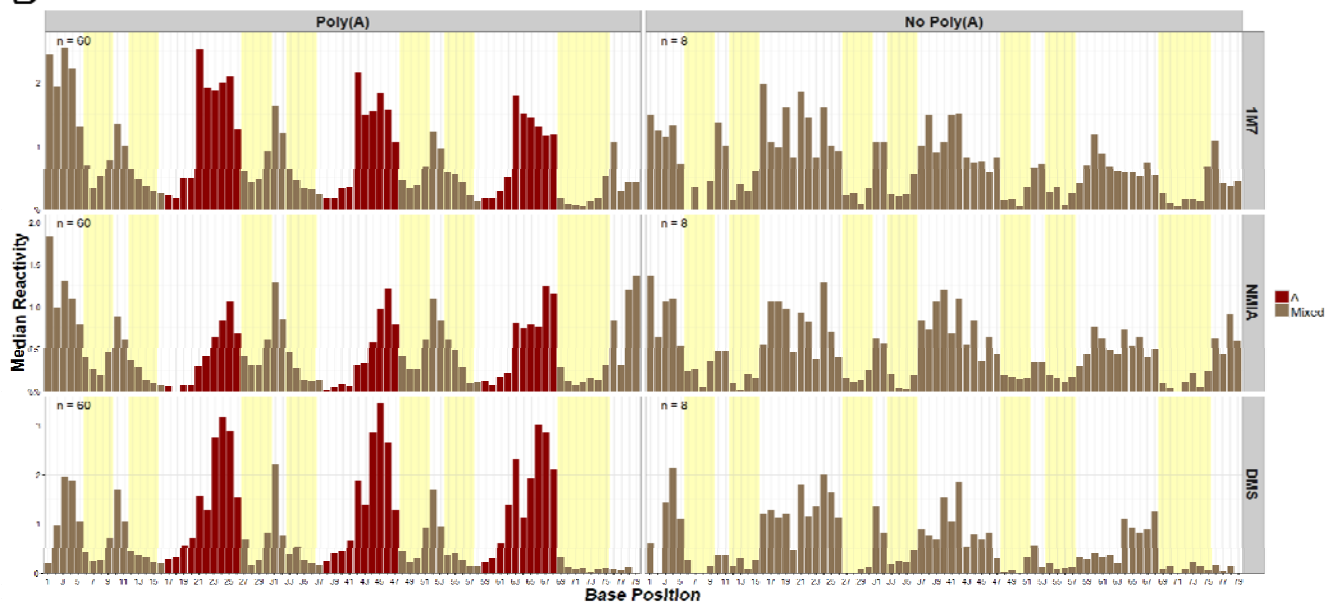

Figure 2. Chemical mapping values using three chemical probes, for the two puzzles in Figure 1. The left column displays the median value at each base position, over all designs that had adenines at the positions colored red. The right column, for comparison, displays the median values over all designs for the same puzzle that had no more than 6 consecutive A's, and shows a completely different distribution than seen in the left column. The number of designs satisfying the respective criterion is shown in the upper left corner of each graph. Experimental conditions were pH 8.0 and 10nM MgCl for all three probes. (A) Big Hairpin Loop. The specified A sequence is 44 nucleotides of a hairpin loop of length 45. The grey background indicates positions where reactivity cannot be assigned at single nucleotide resolution, due to experimental limitations. (B) Triangle of Doom. The specified A sequences are of length 12 in each of three separate loops, two hairpins and one exterior.

sugar. In contrast, DMS methylates the N1 of adenines (and N3 of cytosines).

In Figure 2, the two SHAPE probes, 1M7 and NMIA, show a similar pattern of decreased exposure for all of the poly(A) nucleotides except the six 3'-most ones. But the distribution of exposure values at the 3' end of the loops to 1M7 and NMIA is also noteworthy, especial in

figure 1B. Differences in reactivity between these two SHAPE reagents have been proposed as a way to detect backbone configurations that are different than those found in A-form double helices.<sup>19</sup>



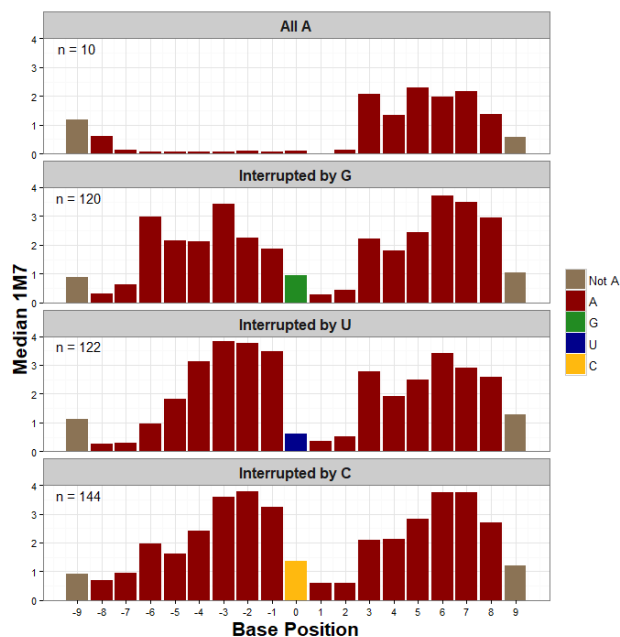

Figure 4. Results from Intrinsic - Frequency 8 puzzle. Protection (1M7) of A17, interrupted by a single non-A nucleotide in the middle position. Base positions are relative to the middle position.

In summary, the data suggest that poly(A) sequences of length seven or more do form a well-defined structure at pH 8.0 and MgCl concentrations of 10 mM. The structure requires a minimum of seven consecutive A's, and in longer sequences, a clear difference arises between the 5' and 3' ends. The 5' end becomes very resistant to chemical interaction, while the six adenosines at the 3' end become more reactive than those in a single stranded sequence of six or fewer A's. This structure seems to be dependent on both hydrogen bonding between the nucleic acids and stabilization of the backbone by Mg<sup>+2</sup> ions; however, we cannot rule out configurations whose chemical reactivity to DMS or SHAPE reactions is perturbed by other effects, such as electronic rearrangements that may be associated with syn conformations of the nucleobase. Finally, a single non-A nucleotide is sufficient to interrupt the structure, but it forms independently on each side of the interruption.

Because the putative structure for poly(A) would have such a large effect on subsequent biological research, the Das lab has been conducting additional gel electrophoresis experiments to verify that the data are not artifacts of the massively parallel experimental process.<sup>21</sup> These experiments have confirmed the details presented here. However, experiments haven't yet ruled out one last possibility -- that the reverse transcriptase has a previously undiscovered ability to consistently transcribe even chemically modified A's once it has transcribed ~6 consecutive unmodified A's. A new experiment is currently being conducted that should rule out or confirm that hypothesis.

Why is poly(A) so ubiquitous in nature? An understanding of this structure at atomic resolution may lead

to advances in understanding what are the unique characteristics of poly(A).

As one example, consider the addition of the poly(A) tail to most eukaryotic mRNAs. It is known that after the cleavage and polyadenylation specificity factor (CPSF) binds to a pre-mRNA, a polyadenylate polymerase (PAP) can start creating the poly(A) tail. However, the tail grows distributive because the PAP is loosely bound and falls off the growing tail after each addition. Once the tail has grown to a length of 10 or 11 nucleotides, nuclear poly(A) binding protein (PABPN1) binds to the poly(A) complex, and the tail grows rapidly to its mature length.<sup>22</sup>

X-ray crystallography has determined the atomic level structure of the PABPN1 RNA recognition motif (RRM) that serves to bind the PABPN1 selectively to the sufficiently long poly(A) tail.<sup>22</sup> However, the atomic level details of how the RRM binds to the poly(A) is still a mystery.<sup>23</sup> Determining the structure implied by our data is likely to answer this question.

Another open question, involving templated poly(A) sequences, is why mRNA translation stalls when polylysine is encoded for by three consecutive AAA codons, i.e. nine consecutive A's.<sup>24</sup> Since this put the number of consecutive A's in the range where the inferred structure forms, it may well be part of the causal chain.

These are but two examples where it seems that the character of poly(A) changes as the length transitions through the 7-12 range. Given the ubiquity of poly(A) in nature, there are likely to be many others. We hope calling attention to the chemical mapping data will help spark interest in understanding what is happening and why poly(A) seems to be involved in so many different biological activities.

## AUTHOR INFORMATION

### Corresponding Author

Roger Wellington-Oguri\*  
email: omei@stanford.edu

### Present Addresses

Roger Wellington-Oguri  
2538 Arnott Street  
San Diego, CA 92110

Eli Fisker  
Stanford Department of Biochemistry  
B400 Beckman Center  
279 Campus Drive  
Stanford, CA 94305

### Author Contributions

The manuscript was written through contributions of all authors. All authors have given approval to the final version of the manuscript.

### Funding Sources

Eterna is supported by the National Institutes of Health (R01 GM100953 to R. Das and A. Treuille). No competing financial interests have been declared.

## ACKNOWLEDGMENT

We thank Rhiju Das for encouragement to organize our observations into a form suitable for publication and for his generous editorial guidance.

## ABBREVIATIONS

SHAPE, Selective 2' hydroxyl acylation analyzed by primer extension; NMIA, N-methylisatoic anhydride; IM7, 1-methyl-7-nitroisatoic anhydride; DMS, Dimethyl sulfide, PABPN1, Nuclear poly(A) binding protein 1; PAP, poly(A) polymerase; RRM, RNA recognition motif.

## REFERENCES

1. Orsi, R. H.; Bowen, B. M.; Wiedmann, M., Homopolymeric tracts represent a general regulatory mechanism in prokaryotes. *BMC Genomics* **2010**, *11*, 102.
2. Tomecki, R.; Dmochowska, A.; Gewartowski, K.; Dziembowski, A.; Stepień, P. P., Identification of a novel human nuclear-encoded mitochondrial poly(A) polymerase. *Nucleic Acids Res* **2004**, *32* (20), 6001-14.
3. Komine, Y.; Kwong, L.; Anguera, M. C.; Schuster, G.; Stern, D. B., Polyadenylation of three classes of chloroplast RNA in *Chlamydomonas reinhardtii*. *RNA* **2000**, *6* (4), 598-607.
4. Rho, H. M.; Green, M., The homopolyadenylate and adjacent nucleotides at the 3'-terminus of 30-40s RNA subunits in the genome of murine sarcoma-leukemia virus. *Proc Natl Acad Sci U S A* **1974**, *71* (6), 2386-90.
5. Meyer, T. J.; Srikanta, D.; Conlin, E. M.; Batzer, M. A., Heads or tails: L1 insertion-associated 5' homopolymeric sequences. *Mob DNA* **2010**, *1* (1), 7.
6. Witz, J.; Luzzati, V., Structure of Polyadenylic Acid and Polyuridylic Acid in Solution: Study by Central X-Ray Scattering. *J Mol Biol* **1965**, *11*, 620-30.
7. Brahms, J.; Michelson, A. M.; Van Holde, K. E., Adenylate oligomers in single- and double-strand conformation. *J Mol Biol* **1966**, *15* (2), 467-88.
8. Hashizume, H.; Imahori, K., Circular dichroism and conformation of natural and synthetic polynucleotides. *J Biochem* **1967**, *61* (6), 738-49.
9. Saenger, W.; Riecke, J.; Suck, D., A structural model for the polyadenylic acid single helix. *J Mol Biol* **1975**, *93* (4), 529-34.
10. Zimmerman, S. B.; Davies, D. R.; Navia, M. A., An ordered single-stranded structure for polyadenylic acid in denaturing solvents. An X-ray fiber diffraction and model building study. *J Mol Biol* **1977**, *116* (2), 317-30.
11. Smith, B. L.; Gallie, D. R.; Le, H.; Hansma, P. K., Visualization of poly(A)-binding protein complex formation with poly(A) RNA using atomic force microscopy. *J Struct Biol* **1997**, *119* (2), 109-17.
12. Akeson, M.; Deamer, D. W.; Vercoutere, W.; Braslau, R.; Olsen, H. In *Use of a Nanoscale Pore to Read Short Segments within Single Polynucleotide Molecules*, Dordrecht, Springer Netherlands: Dordrecht, 2002; pp 187-200.
13. Petrovic, A. G.; Polavarapu, P. L., Structural transitions in polyriboadenylic acid induced by the changes in pH and temperature: vibrational circular dichroism study in solution and film states. *J Phys Chem B* **2005**, *109* (49), 23698-705.
14. Eterna - Invent Medicine. <http://www.etergame.org/web/about/>.
15. Anderson-Lee, J.; Fisker, E.; Kosaraju, V.; Wu, M.; Kong, J.; Lee, J.; Lee, M.; Zada, M.; Treuille, A.; Das, R.; Players, E., Principles for Predicting RNA Secondary Structure Design Difficulty. *J Mol Biol* **2016**, *428* (5 Pt A), 748-757.
16. Seetin, M. G.; Kladwang, W.; Bida, J. P.; Das, R., Massively parallel RNA chemical mapping with a reduced bias MAP-seq protocol. *Methods Mol Biol* **2014**, *1086*, 95-117.
17. Merino, E. J.; Wilkinson, K. A.; Coughlan, J. L.; Weeks, K. M., RNA structure analysis at single nucleotide resolution by selective 2'-hydroxyl acylation and primer extension (SHAPE). *J Am Chem Soc* **2005**, *127* (12), 4223-31.
18. Tijerina, P.; Mohr, S.; Russell, R., DMS footprinting of structured RNAs and RNA-protein complexes. *Nat Protoc* **2007**, *2* (10), 2608-23.
19. Gherghe, C. M.; Mortimer, S. A.; Krahn, J. M.; Thompson, N. L.; Weeks, K. M., Slow Conformational Dynamics at C2'-endo Nucleotides in RNA. *Journal of the American Chemical Society* **2008**, *130* (28), 8884-8885.
20. Kladwang, W.; Mann, T. H.; Becka, A.; Tian, S.; Kim, H.; Yoon, S.; Das, R., Standardization of RNA chemical mapping experiments. *Biochemistry* **2014**, *53* (19), 3063-5.
21. Kladwang, W.; Das, R. *e. a.*, [In preparation].
22. Kühn, U.; Gündel, M.; Knoth, A.; Kerwitz, Y.; Rüdell, S.; Wahle, E., Poly(A) tail length is controlled by the nuclear poly(A)-binding protein regulating the interaction between poly(A) polymerase and the cleavage and polyadenylation specificity factor. *J Biol Chem* **2009**, *284* (34), 22803-14.
23. Kühn, U.; Nemeth, A.; Meyer, S.; Wahle, E., The RNA binding domains of the nuclear poly(A)-binding protein. *J Biol Chem* **2003**, *278* (19), 16916-25.
24. Koutmou, K. S.; Schuller, A. P.; Brunelle, J. L.; Radhakrishnan, A.; Djuranovic, S.; Green, R., Ribosomes slide on lysine-encoding homopolymeric A stretches. *eLife* **2015**, *4*, e05534.
